# Supplementary material for: Quality of life for patients after coronary artery bypass grafting surgery
Source: Research Square preprint supplement (doi:10.21203/rs.3.rs-5898468/v1), 2025-02-04
Supplement: Supplementary file 1 [file ba7d8630a15144b34be897c3.docx]

Table 2: correlation between SF-36 questionnaire domain and overall score.

| Variable | Correlation with Overall Quality of Life | p-value |
| --- | --- | --- |
| PCS | 0.921** | <0.001 |
| PF | 0.679** | <0.001 |
| RP | 0.834** | <0.001 |
| BP | 0.724** | <0.001 |
| GH | 0.184* | 0.03 |
| SF | 0.735** | <0.001 |
| RE | 0.775** | <0.001 |
| Significant results refer to p < 0.05 | | |

Table 4: Association between questionnaire domains based on sleep hours.

| Domain | < 4 hours Median (Min, Max) | 4-6 hours Median (Min, Max) | 6-8 hours Median (Min, Max) | > 10 hours Median (Min, Max) | p-value |
| --- | --- | --- | --- | --- | --- |
| Physical Functioning | 45.00 (0, 100) | 45.00 (0, 100) | 65.00 (0, 100) | 55.00 (0, 90) | 0.030 |
| Social Functioning | 48.75 (0, 77.5) | 77.50 (30, 100) | 87.50 (0, 100) | 55.00 (0, 100) | 0.008 |
| Pain | 38.75 (0, 65) | 62.50 (22.5, 100) | 70.00 (0, 100) | 45.00 (0, 100) | 0.027 |
| General Health | 50.00 (20, 55) | 50.00 (10, 75) | 55.00 (30, 85) | 55.00 (45, 60) | 0.246 |
| Role Limitations (Physical) | 0.00 (0, 25) | 0.00 (0, 100) | 50.00 (0, 100) | 0.00 (0, 100) | 0.023 |
| Role Limitations (Emotional) | 0 (0, 100) | 100.00 (0, 100) | 100.00 (0, 100) | 0.00 (0, 100) | 0.001 |
| Independent-Samples Kruskal-Wallis Test | | | | | |

Table 6: A multiple regression model to predict overall- QOL score using patients' socio-demographic characteristics.

|  | **Overall-QOL** | | | | |
| --- | --- | --- | --- | --- | --- |
| **Model** | **Unstandardized Coefficients (B)** | **Standardized Coefficients (Beta)** | **P-value** | **95% Confidence Interval for B** | |
|  |  |  |  | **Lower Bound** | **Upper Bound** |
| (Constant) | 52.629 |  | 0.159 | -22.827 | 128.085 |
| Age | 0.075 | 0.027 | 0.856 | -0.785 | 0.935 |
| Weight | -0.45 | -0.241 | 0.066 | -0.933 | 0.034 |
| Gender (Male; Reference: Female) | 21.339 | 0.136 | 0.339 | -24.572 | 67.251 |
| Sleep = 4 hours (Reference: < 4 hours) | -11.556 | -0.074 | 0.672 | -68.277 | 45.166 |
| Sleep = 4-6 hours | 24.22 | 0.372 | 0.102 | -5.411 | 53.851 |
| Sleep = 6-8 hours | 39.526 | 0.75 | 0.005 | 13.813 | 65.238 |
| Sleep = > 10 hours | 21.787 | 0.351 | 0.117 | -6.08 | 49.653 |
| Ex-Smoker (Reference: Current smoker) | 7.459 | 0.14 | 0.424 | -11.805 | 26.724 |
| Non-smoker (Reference: Current smoker) | -17.902 | -0.114 | 0.421 | -63.877 | 28.073 |
| Smoking Index | -6.981 | -0.303 | 0.168 | -17.233 | 3.271 |
| Diabetes (Yes) | 15.216 | 0.289 | 0.071 | -1.459 | 31.892 |
| Cholesterol (Yes) | -18.096 | -0.346 | 0.041 | -35.372 | -0.82 |
| Hypertension (Yes) | 1.179 | 0.02 | 0.893 | -17.058 | 19.415 |
| Family History of Heart Disease (Yes) | -10.032 | -0.183 | 0.181 | -25.247 | 5.184 |
| Current Illness (Yes) | -8.654 | -0.165 | 0.28 | -25.077 | 7.768 |
| Married (Reference: Single) | 6.481 | 0.104 | 0.639 | -22.265 | 35.227 |
| Widowed (Reference: Single) | 20.724 | 0.223 | 0.228 | -14.361 | 55.81 |
| Divorced (Reference: Single) | -16.127 | -0.103 | 0.489 | -64.397 | 32.143 |
| Adjusted R2= 0.643  F (18,16) = 4.402  P= 0.002  Durbin Watson = 1.800  Significant results refer to p < 0.05 | | | | | |
